# Supplementary material for: A flexible, robust cellulose/phytic acid/polyaniline hydrogel for all-in-one supercapacitors and strain sensors
Source: Royal Society of Chemistry journal article supplement (doi:10.1039/d2ta03835h), 2022-01-01
Supplement: d2ta03835h1.pdf [file d2ta03835h1.pdf]

## Supporting Information

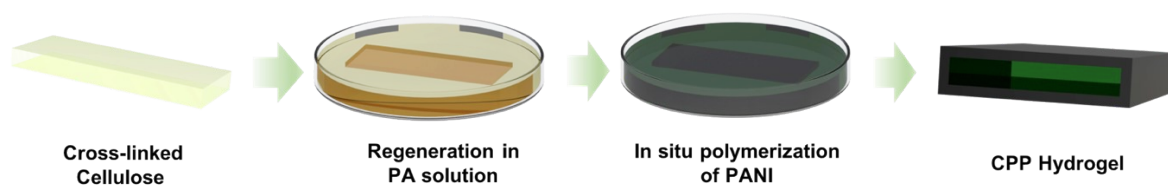

**Fig. S1** Fabrication process of CPP.

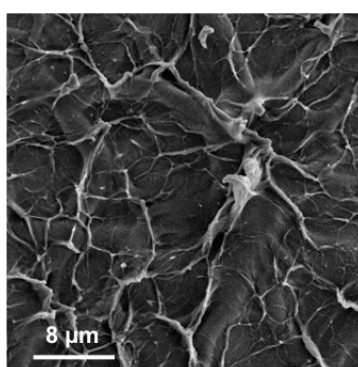

**Fig. S2** Surface SEM image of CP.

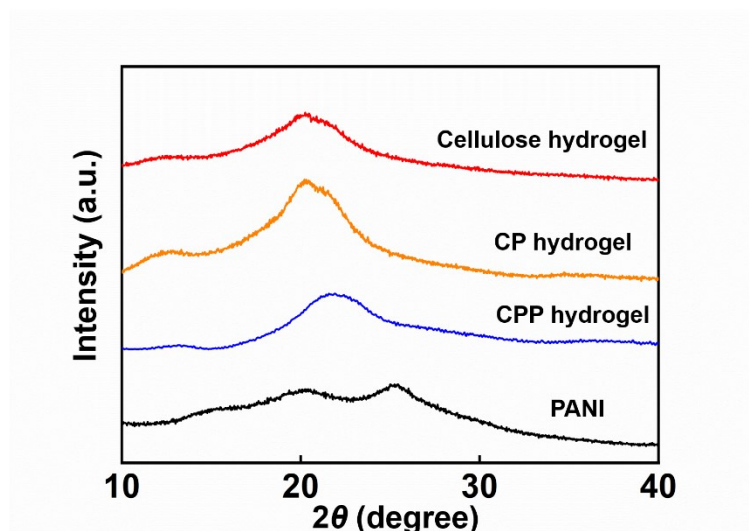

**Fig. S3** XRD spectra of cellulose hydrogel, CP, CPP-1.5 and PANI.

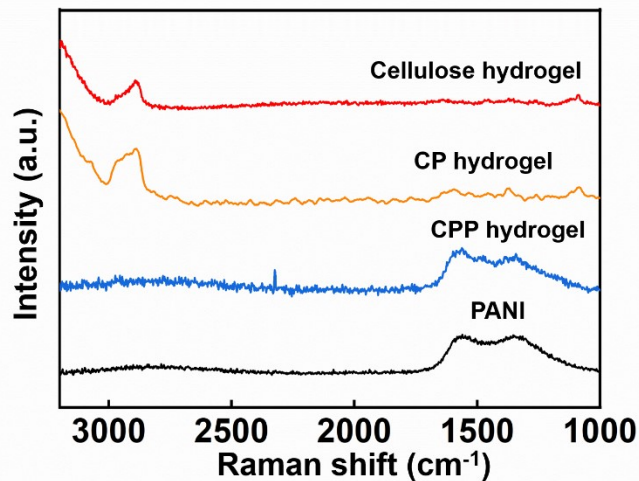

**Fig. S4** Raman spectra of cellulose hydrogel, CP, CPP-1.5 and PANI.

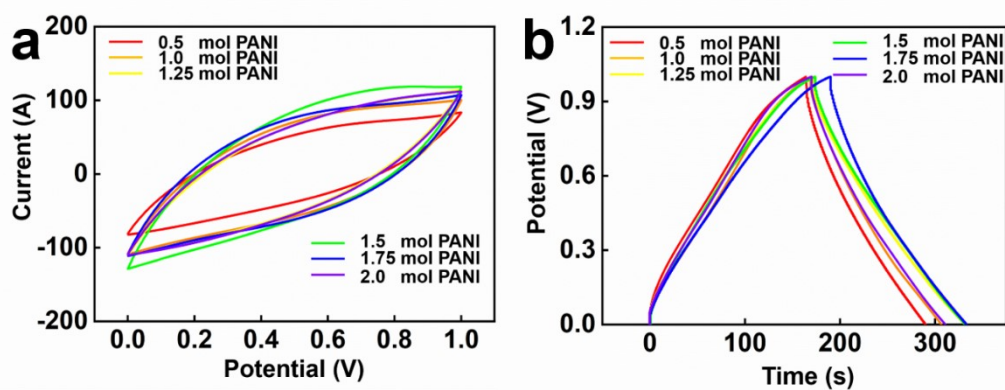

**Fig. S5** (a) CV curves of CPP-0.5, CPP-1.0, CPP-1.25, CPP-1.5, CPP-1.75 and CPP-2.0 at a scan rate of 100 mV/s. (b) GCD curves of CPP-0.5, CPP-1.0, CPP-1.25, CPP-1.5, CPP-1.75 and CPP-2.0 at a current density of 5 mA/cm<sup>2</sup> under voltage of 1.0 V.

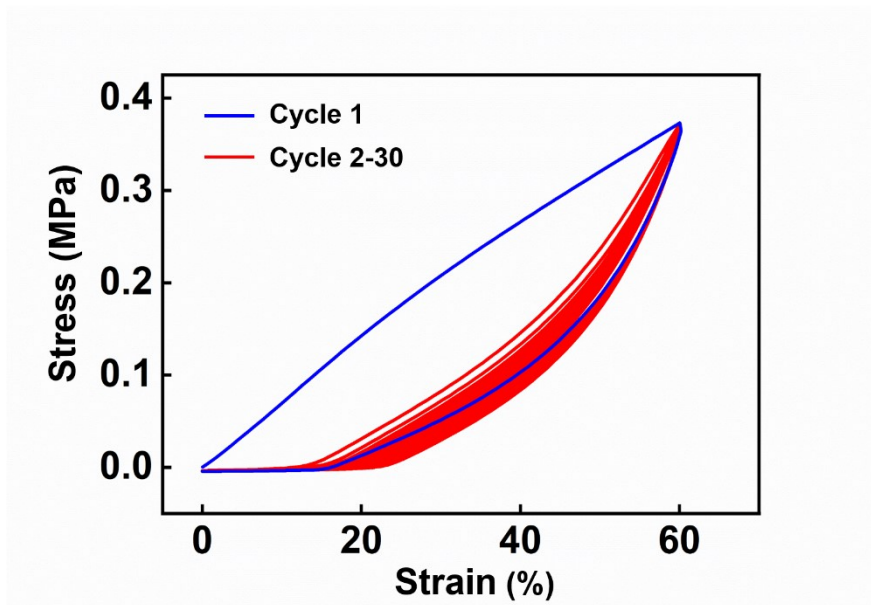

**Fig. S6** Tensile stress-strain curves of CPP-1.5 within 60 % strain during loading-unloading cycles.

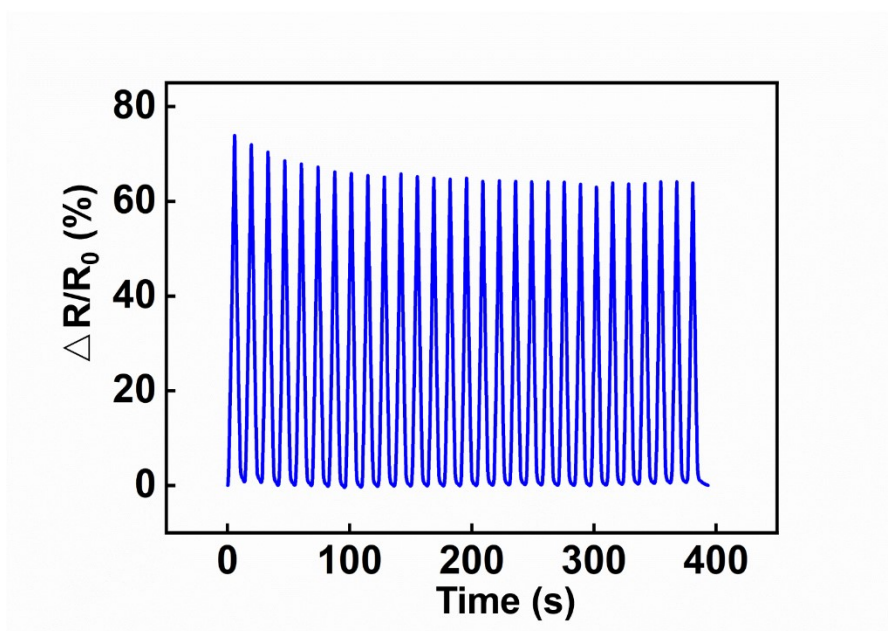

**Fig. S7** Response of CPP-1.5 strain sensor during 30 cycles between 0 and 60 % strain.

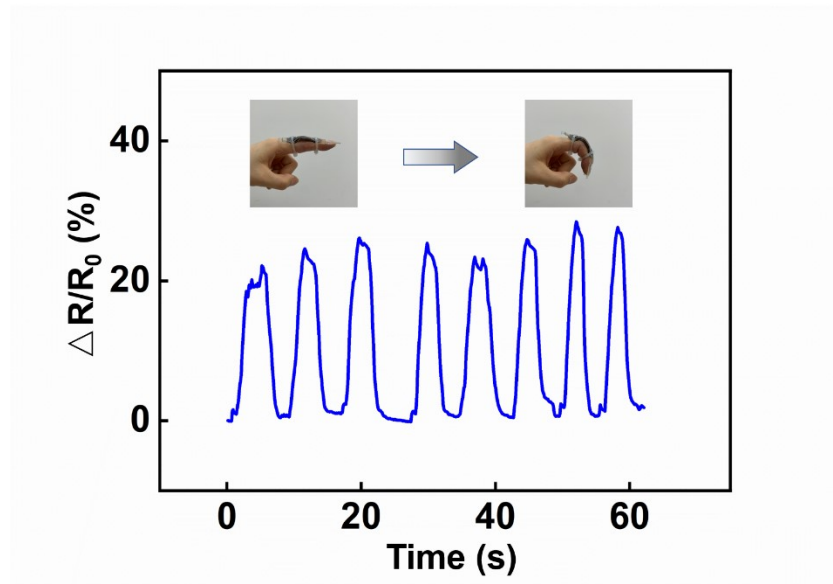

**Fig. S8** Response of CPP-1.5 sensor in detecting finger bending.

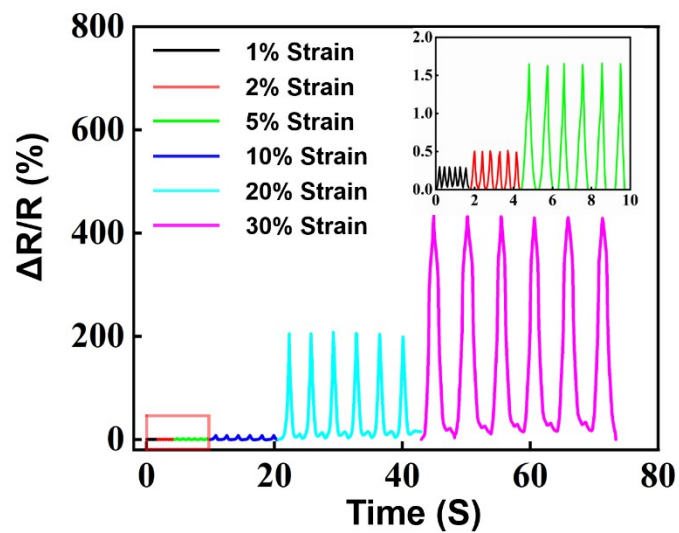

**Fig. S9** Normalized resistance changes of the structural sensor under different tensile deformation with the frequencies of 10 %/s.

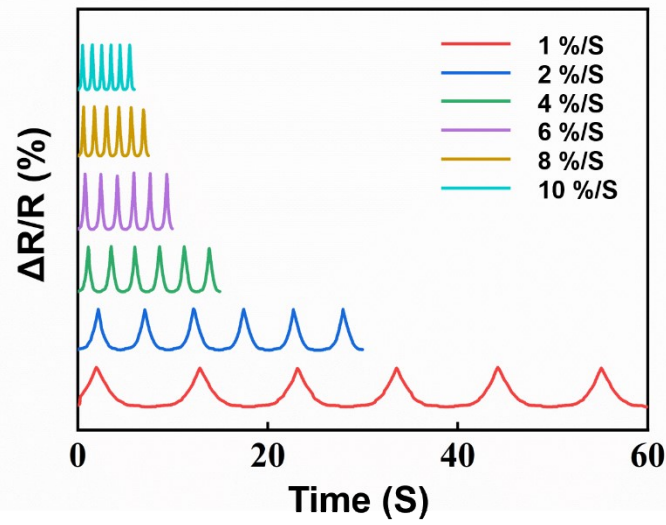

**Fig. S10** Normalized resistance changes of the structural sensor under the strain of 10 % with different deformation frequencies.

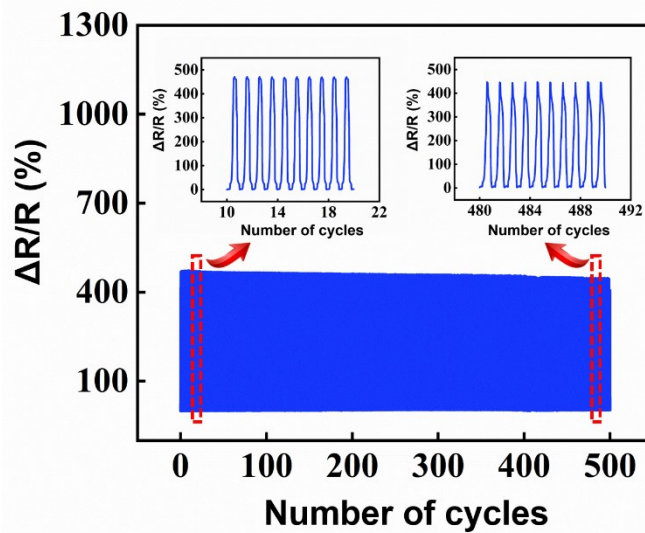

**Fig. S11** Relative resistance changes of structural CPP-1.5 strain sensor under repeated loading–unloading processes with a strain of 30 % for 500 cycles.

**Table. S1** Comparison of reported all-in-one supercapacitors.

| Materials                                               | $C_t(\text{mF}/\text{cm}^2)$     | Cyclic Stability | References       |
|---------------------------------------------------------|----------------------------------|------------------|------------------|
| Cellulose/PA/PANI                                       | 1210.7 (1.0mA/cm <sup>2</sup> )  | 84.00 % (5000)   | <i>This work</i> |
| PANI/cellulose/PAAM                                     | 835.0 (1.0mA/cm <sup>2</sup> )   | 96.00 % (5000)   | 1                |
| PANI/( $\beta$ )CD <sub>3</sub> -g-Cell                 | 1003.50 (1.0mA/cm <sup>2</sup> ) | 90.00 % (2000)   | 2                |
| PPy/KCl/PVA                                             | 224 (0.8 mA/cm <sup>2</sup> )    | 92.00 % (1000)   | 3                |
| MOF-PPy/PDA/BC                                          | 1710 (0.4mA/cm <sup>2</sup> )    | 71.04 % (5000)   | 4                |
| PANI/PCH                                                | 488 (0.2mA/cm <sup>2</sup> )     | 90.00 % (7000)   | 5                |
| PPy/CPH                                                 | 261.2 (0.1mA/cm <sup>2</sup> )   | 86.30 % (10,000) | 6                |
| PANI-CNTP/PM                                            | 158.4                            | -                | 7                |
| PPy-PANI/H <sub>2</sub> SO <sub>4</sub> /PVA            | 773 (0.2 mA/cm <sup>2</sup> )    | 85 % ( 1900 )    | 8                |
| Ti <sub>3</sub> C <sub>2</sub> T <sub>x</sub> /NaOH/PVA | 559.3                            | -                | 9                |
| CMC/ZnSO <sub>4</sub>                                   | 1297 (0.16 mA cm <sup>-2</sup> ) | 100 % (10000)    | 10               |

**Table. S2** Gauge factor (GF) of reported gel-based strain sensors.

| Materials                          | GF    | Strain range (%) | Reference        |
|------------------------------------|-------|------------------|------------------|
| Cellulose/PA/PANI                  | 2.62  | 0-120            | <i>This work</i> |
| Cellulose/PA/PANI (zigzag pattern) | 20.74 | 0-40             | <i>This work</i> |
| Cellulose/GnPs plates              | 5.87  | 0-6              | 11               |
| COH                                | 1.02  | 0-30             | 12               |
| WCT                                | 1.00  | 0-80             | 13               |
| ACC/PAA/alginate                   | 1.19  | 0-325            | 14               |
| PVA/PVP/CNC hydrogel               | 0.48  | 0-150            | 15               |

|                                           |      |       |    |
|-------------------------------------------|------|-------|----|
| Cellulose /PVA hydrogel                   | 1.04 | 0-500 | 16 |
| PAA/PDArGO/Fe <sup>3+</sup> hydrogel      | 1.32 | 0-500 | 17 |
| OP/PVA/borax hydrogel                     | 6.34 |       | 18 |
| HEC/Ag/polyacrylamide functional hydrogel | 4.07 | 0-200 | 19 |
| PU-DA-1/1-PANI hydrogel                   | 2.90 | 0-120 | 20 |

## Reference

- 1 Y. Li, Q. Gong, X. Liu, Z. Xia, Y. Yang, C. Chen and C. Qian, *Carbohydr. Polym.*, 2021, **267**, 118207.
- 2 Q. Gong, Y. Li, X. Liu, Z. Xia and Y. Yang, *Carbohydr. Polym.*, 2020, **245**, 116611.
- 3 K. Sun, E. Feng, G. Zhao, H. Peng, G. Wei, Y. Lv and G. Ma, *ACS Sustain. Chem. Eng.*, 2018, **7**, 165-173.
- 4 J. Zhou, Y. Yuan, J. Tang and W. Tang, *Energy Stor. Mater.*, 2019, **23**, 594-601.
- 5 K. Wang, X. Zhang, C. Li, X. Sun, Q. Meng, Y. Ma and Z. Wei, *Adv. Mater.*, 2015, **27**, 7451-7457.
- 6 L. Zang, Q. Liu, J. Qiu, C. Yang, C. Wei, C. Liu and L. Lao, *ACS Appl. Mater. Interfaces*, 2017, **9**, 33941-33947.
- 7 L. Chen, Z. Gu, L. Li, W. Lei, Q. Rong, C. Zhao, Q. Wu, Z. Gu, X. Jin, L. Jiang and M. Liu, *J. Mater. Chem. A*, 2018, **6**, 15147-15153.
- 8 L. Guo, W.-B. Ma, Y. Wang, X.-Z. Song, J. Ma, X.-D. Han, X.-Y. Tao, L.-T. Guo, H.-L. Fan, Z.-S. Liu, Y.-B. Zhu and X.-Y. Wei, *J. Alloys Compd.*, 2020, **843**, 155895.
- 9 J. Yu, J. Zhou, P. Yao, J. Huang, W. Sun, C. Zhu and J. Xu, *J. Power Sources*, 2019, **440**, 227150.
- 10 P. Zhang, Y. Li, G. Wang, F. Wang, S. Yang, F. Zhu, X. Zhuang, O. G. Schmidt and X. Feng, *Adv. Mater.*, 2019, **31**, 1806005.
- 11 Y. Liu, L. Liu, Z. Li, Y. Zhao and J. Yao, *Cellulose*, 2019, **26**, 9255-9268.
- 12 X. Qian and A. Lu, *ACS Appl. Polym. Mater.*, 2021, **3**, 3747-3754.
- 13 S. Zhang, K. Sun, H. Liu, X. Chen, Y. Zheng, X. Shi, D. Zhang, L. Mi, C. Liu and C. Shen, *Chem. Eng. J.*, 2020, **387**, 124045.
- 14 J. Yang, Z. Xu, J. Wang, L. Gai, X. Ji, H. Jiang and L. Liu, *Adv. Funct. Mater.*, 2021, **31**, 2009438.

- 15 Y. J. Liu, W. T. Cao, M. G. Ma and P. Wan, *ACS Appl. Mater. Interfaces* , 2017, **9**, 25559-25570.
- 16 Y. Wang, L. N. Zhang and A. Lu, *J. Mater. Chem. A*, 2020, **8**, 13935-13941.
- 17 X. Jing, H.-Y. Mi, X.-F. Peng and L.-S. Turng, *Carbon*, 2018, **136**, 63-72.
- 18 Y. Ma, K. Liu, L. Lao, X. Li, Z. Zhang, S. Lu, Y. Li and Z. Li, *Int. J. Biol. Macromol.*, 2022, DOI: <https://doi.org/10.1016/j.ijbiomac.2022.02.065>.
- 19 X. Wang, Z. Wang, X. Wang, L. Shi and R. Ran, *Carbohydr. Polym.*, 2021, **257**, 117665.
- 20 Y. Fang, J. Xu, F. Gao, X. Du, Z. Du, X. Cheng and H. Wang, *Compos. B. Eng.*, 2021, **219**, 108965.
